# Supplementary material for: Mannose-Binding Lectin 2 as a Potential Therapeutic Target for Hepatocellular Carcinoma: Multi-Omics Analysis and Experimental Validation
Source: MDPI journal article supplement (doi:10.3390/cancers15194900), 2023-10-09

## *Supplementary Material*

### **Mannose-Binding Lectin 2 as a Potential Therapeutic Target for Hepatocellular Carcinoma: Multi-Omics Analysis and Experimental Validation**

Hangyu Liao, Jun Yang, Yuyan Xu, Juncheng Xie, Ke Li, Kunling Chen, Jingyuan Pei, Qiong Luo, Mingxin Pan\*

\* Correspondence: Mingxin Pan: [panmx@smu.edu.cn](mailto:panmx@smu.edu.cn)

**Supplementary Figure S2.** (A) Heat map illustrating the top 50 genes that exhibit negative correlation with MBL2. (B-C) Significantly enriched KEGG pathways and transcription factor targets of the genes coexpressed with MBL2 in HCC. (D) Pathway activation chart. Green lines show top 10 most strongly activated pathways (ordered top to bottom), red lines show top 10 most strongly inhibited pathways (ordered bottom to top). Thickness is proportionate to absolute value of PAL. (E) Analysis of differential expression of apoptosis-related biomarkers between distinct MBL2 expression cohorts in the TCGA-LIHC dataset.

MBL2, mannose-binding lectin 2; KEGG, Kyoto Encyclopedia of Genes and Genomes; TCGA-LIHC, The Cancer Genome Atlas-Liver Hepatocellular Carcinoma

A

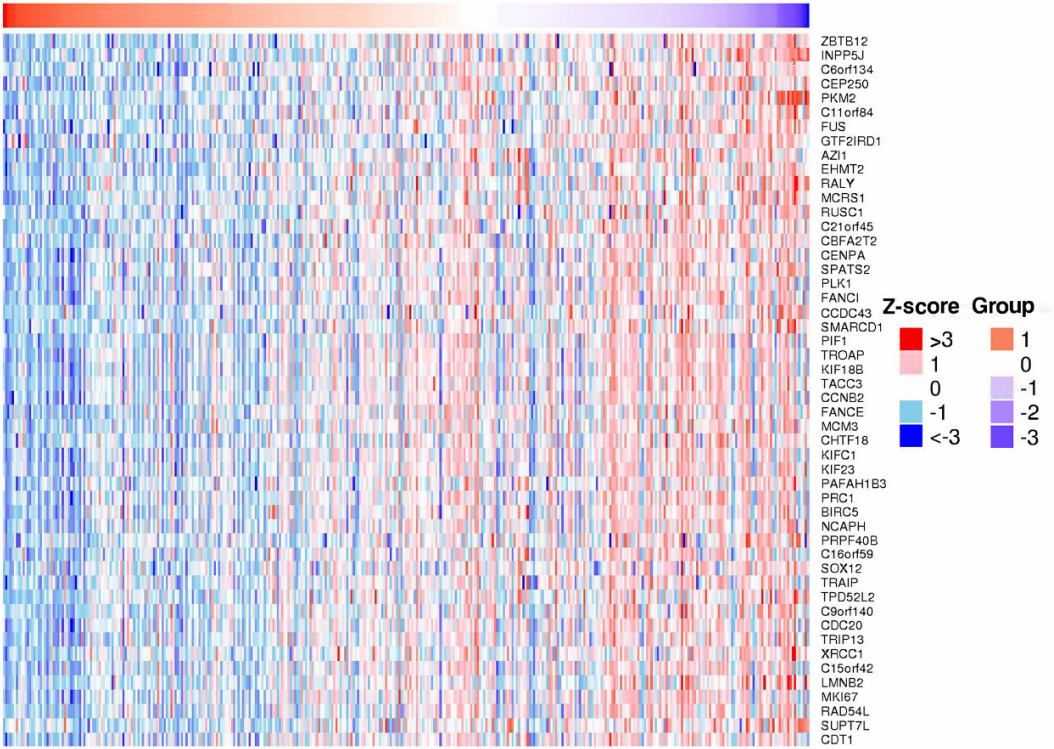

B

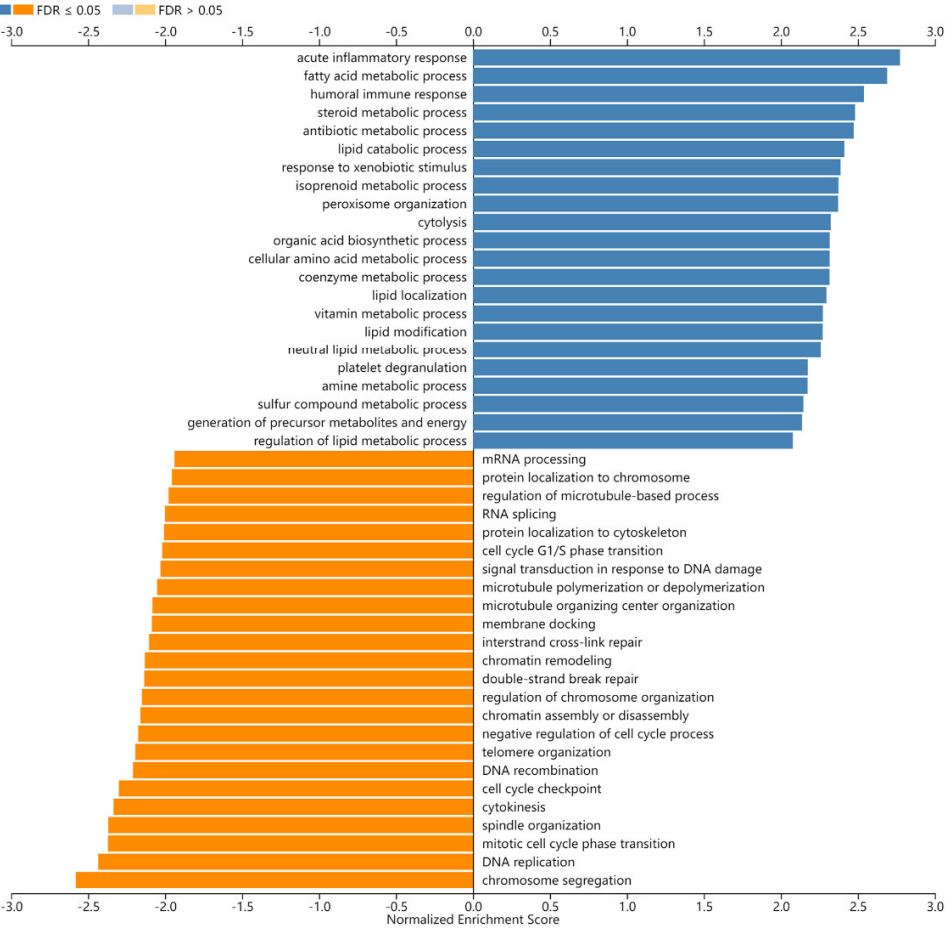

C

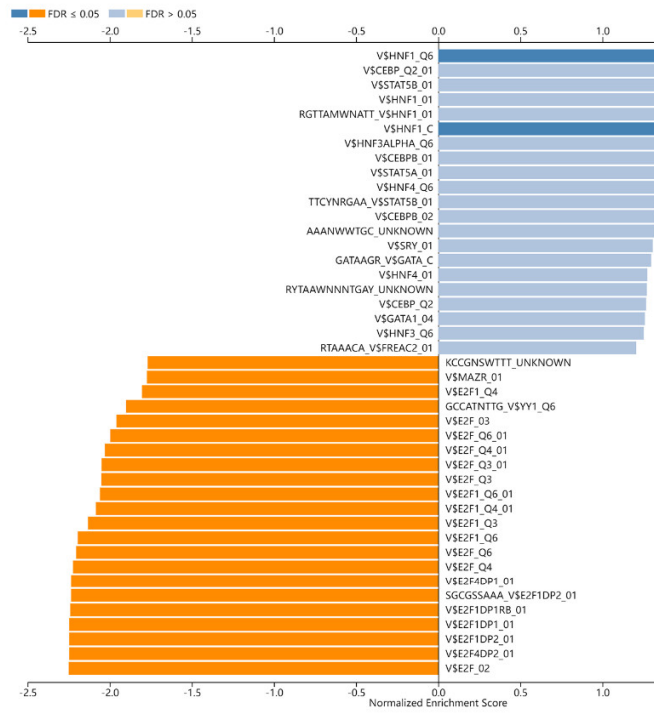

D

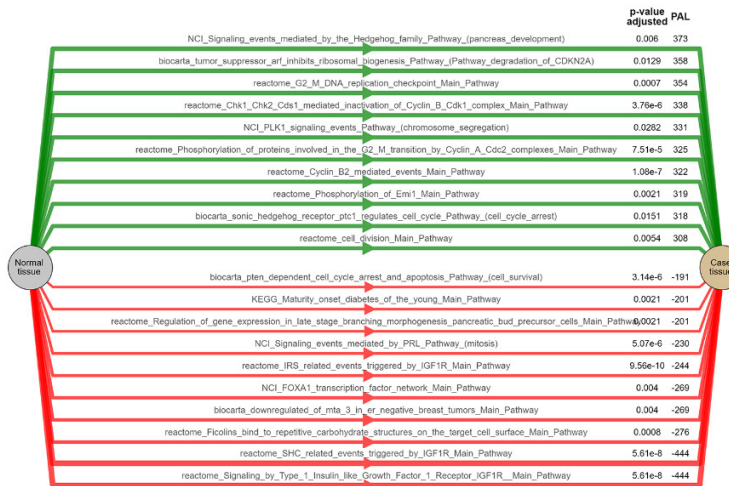

E

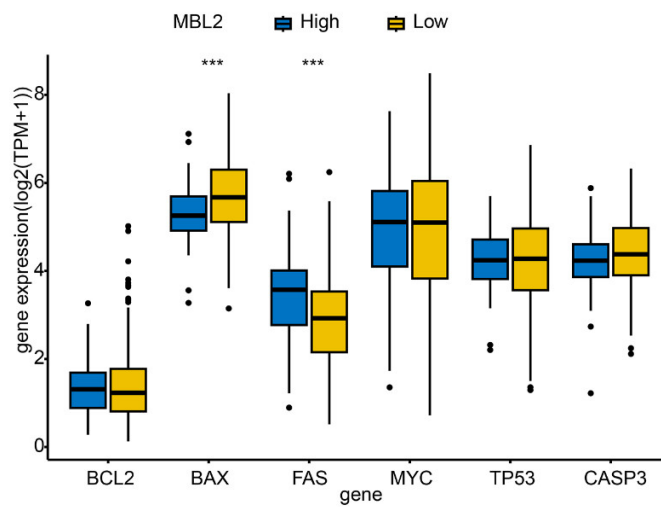

Supplement: s1 [file s1]
