# Supplementary material for: Mannose-Binding Lectin 2 as a Potential Therapeutic Target for Hepatocellular Carcinoma: Multi-Omics Analysis and Experimental Validation
Source: MDPI journal article supplement (doi:10.3390/cancers15194900), 2023-10-09
Supplement: s1 [file s1]

# Supplementary Material

## Mannose-Binding Lectin 2 as a Potential Therapeutic Target for Hepatocellular Carcinoma: Multi-Omics Analysis and Experimental Validation

Hangyu Liao, Jun Yang, Yuyan Xu, Juncheng Xie, Ke Li, Kunling Chen, Jingyuan Pei, Qiong Luo, Mingxin Pan\*

\* Correspondence: Mingxin Pan: panmx@smu.edu.cn

### 1. Supplementary Tables

Supplementary Table S1: Sequences of the miRNA mimics and negative control

| RNA oligo         | Sequences                    |
|-------------------|------------------------------|
| miR-34c-3p mimics | AAU CAC UAA CCA CAC GGC CAGG |
|                   | UGG CCG UGU GGU UAG UGA UUUU |
| Negative control  | UUC UCC GAA CGU GUC ACG UTT  |
|                   | ACG UGA CAC GUU CGG AGA ATT  |

Supplementary Table S2: Sequences of the miRNA inhibitor and negative control

| RNA oligo                        | Sequences              |
|----------------------------------|------------------------|
| miR-34c-3p inhibitor             | CCUGGCCGUGUGGUUAGUGAUU |
| MiRNA inhibitor negative control | CAGUACUUUUGUGUAGUACAA  |

**Supplementary Table S3:** Sequences of the constructed plasmids and the mutation sites

| Name     | sequences                                                                                                                                                                                                                                                                                                                                                                                                                                                        |
|----------|------------------------------------------------------------------------------------------------------------------------------------------------------------------------------------------------------------------------------------------------------------------------------------------------------------------------------------------------------------------------------------------------------------------------------------------------------------------|
| MBL2-WT  | GCTAGCTTTCTACAAAATCCTGATGAGGTTTCTACTGGGACCACATTGAGTCTATCAATCAACTT<br>ATGCAGAACTGGCAACTTACTACTGAATCTCTAATCAATGTTTCATCATGTATCGCTTCATGTAAC<br>TAGAATTTCTTTAACTTAATTGCTATGTTTTGACATTTTGTAGTTTAAAAACCTTGTATATCTTGT<br>TTTGGTGGTTT <b>TAGTGA</b> TTTAAATAATATATTTTAAATATTTTTCTTTCTATTGTTGTACACA<br>GAAATACAGTTAAGTTTGTGTGTAGTCTTACGATGTTTAGTAACTCAATAAGTTTATTTCTTA<br>AATCTAGTAATTTGTAGATTCCTCTGGATTTTGTATATGCATAGTCATGTAAGCTGAAAAATATGG<br>CAATACTTGCTTCTTCCCAAGTCGAC |
| MBL2-Mut | GCTAGCTTTCTACAAAATCCTGATGAGGTTTCTACTGGGACCACATTGAGTCTATCAATCAACTT<br>ATGCAGAACTGGCAACTTACTACTGAATCTCTAATCAATGTTTCATCATGTATCGCTTCATGTAAC<br>TAGAATTTCTTTAACTTAATTGCTATGTTTTGACATTTTGTAGTTTAAAAACCTTGTATATCTTGT<br>TTTGGTGGTTT <b>GATTAA</b> TTTAAATAATATATTTTAAATATTTTTCTTTCTATTGTTGTACACA<br>GAAATACAGTTAAGTTTGTGTGTAGTCTTACGATGTTTAGTAACTCAATAAGTTTATTTCTTA<br>AATCTAGTAATTTGTAGATTCCTCTGGATTTTGTATATGCATAGTCATGTAAGCTGAAAAATATGG<br>CAATACTTGCTTCTTCCCAAGTCGAC |
