# Supplementary material for: Mannose-Binding Lectin 2 as a Potential Therapeutic Target for Hepatocellular Carcinoma: Multi-Omics Analysis and Experimental Validation
Source: MDPI journal article supplement (doi:10.3390/cancers15194900), 2023-10-09

## Supplementary Material

### Mannose-Binding Lectin 2 as a Potential Therapeutic Target for Hepatocellular Carcinoma: Multi-Omics Analysis and Experimental Validation

Hangyu Liao, Jun Yang, Yuyan Xu, Juncheng Xie, Ke Li, Kunling Chen, Jingyuan Pei, Qiong Luo, Mingxin Pan\*

\* Correspondence: Mingxin Pan: panmx@smu.edu.cn

**Supplementary Figure S3.** (A) The calculated intensity ratios of Western blot bands indicated that the protein expression of MBL2 was increased in the LV-MBL2 group compared to the control group in both Huh7 and BEL-7404 cell lines. (B) In both Huh7 and BEL-7404 cell lines, the translational expression of MBL2 was reduced in the miR-34c-3p mimics group compared to the control group. (C) Protein–protein interaction network analysis for MBL2 in STRING online portal.

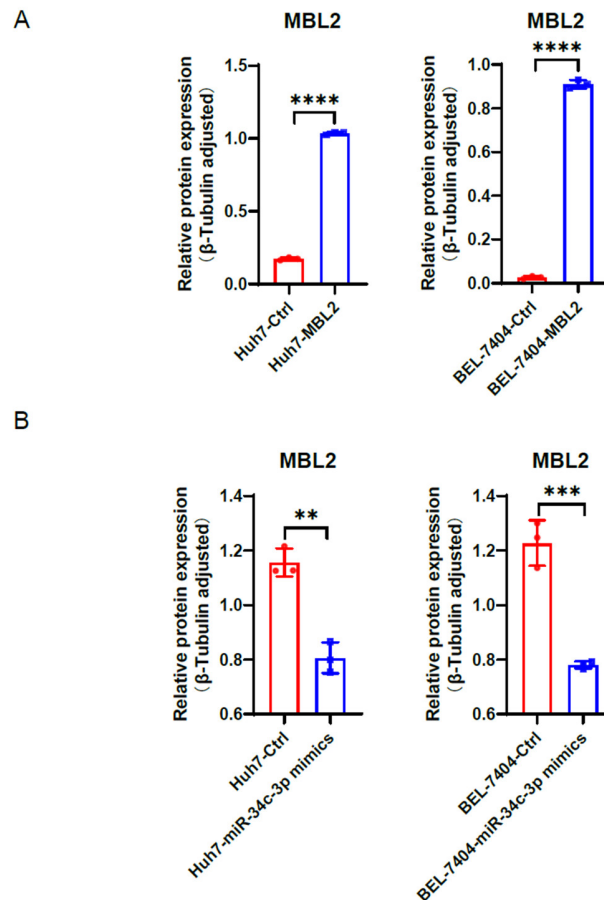

C

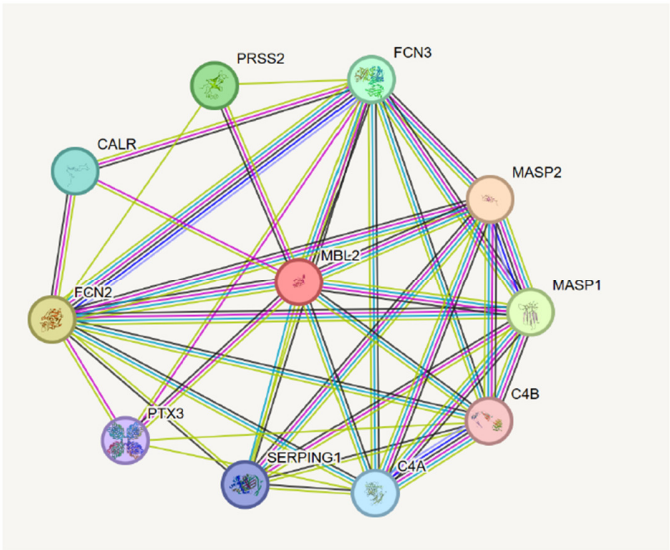

Supplement: s1 [file s1]
