# Supplementary material for: Mannose-Binding Lectin 2 as a Potential Therapeutic Target for Hepatocellular Carcinoma: Multi-Omics Analysis and Experimental Validation
Source: MDPI journal article supplement (doi:10.3390/cancers15194900), 2023-10-09

## *Supplementary Material*

### **Mannose-Binding Lectin 2 as a Potential Therapeutic Target for Hepatocellular Carcinoma: Multi-Omics Analysis and Experimental Validation**

Hangyu Liao, Jun Yang, Yuyan Xu, Juncheng Xie, Ke Li, Kunling Chen, Jingyuan Pei, Qiong Luo, Mingxin Pan\*

\* Correspondence: Mingxin Pan; [panmx@smu.edu.cn](mailto:panmx@smu.edu.cn)

**Supplementary Figure S1.** (A) ANTE database indicated that the expression of MBL2 in the liver is relatively higher compared to other normal human tissues. (B) The mRNA expression of MBL2 in tumor and paired adjacent liver tissues from the HBV-HCC cohort was analyzed. (C) MBL2 expression was significantly lower in the proliferation than in the metabolism and microenvironment dysregulated subgroups. (D-E) Survival analysis of HCC patients based on the expression of MBL2, 324 including the ICGC database (D) and the HBV-HCC cohort (E). (F) Multivariate Cox regression analyse of MBL2 with other clinical parameters in the HBV-HCC cohort.

ANTE, atlas of normal tissue expression; MBL2, mannose-binding lectin 2; TCGA, The Cancer Genome Atlas; HBV-HCC, hepatitis B virus-related hepatocellular carcinoma

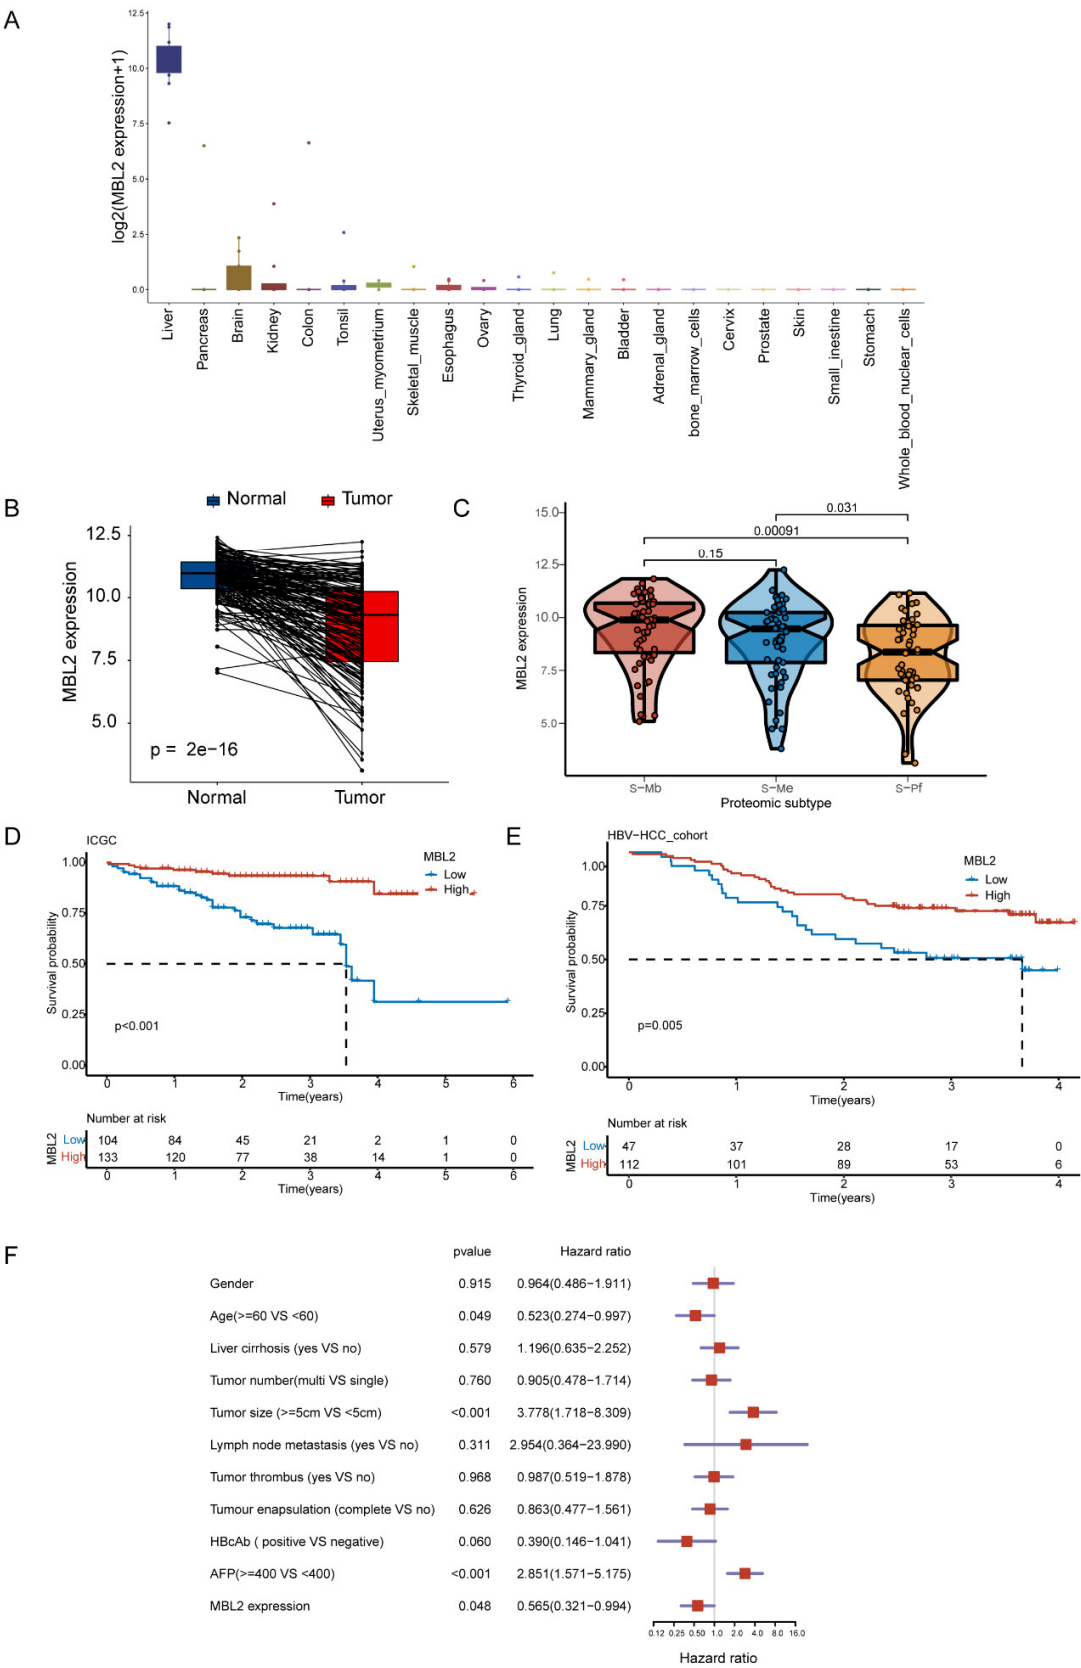

Supplement: s1 [file s1]
