# Supplementary figures and images for: Mannose-Binding Lectin 2 as a Potential Therapeutic Target for Hepatocellular Carcinoma: Multi-Omics Analysis and Experimental Validation
Source: MDPI journal article supplement (doi:10.3390/cancers15194900), 2023-10-09

Figure 3-C

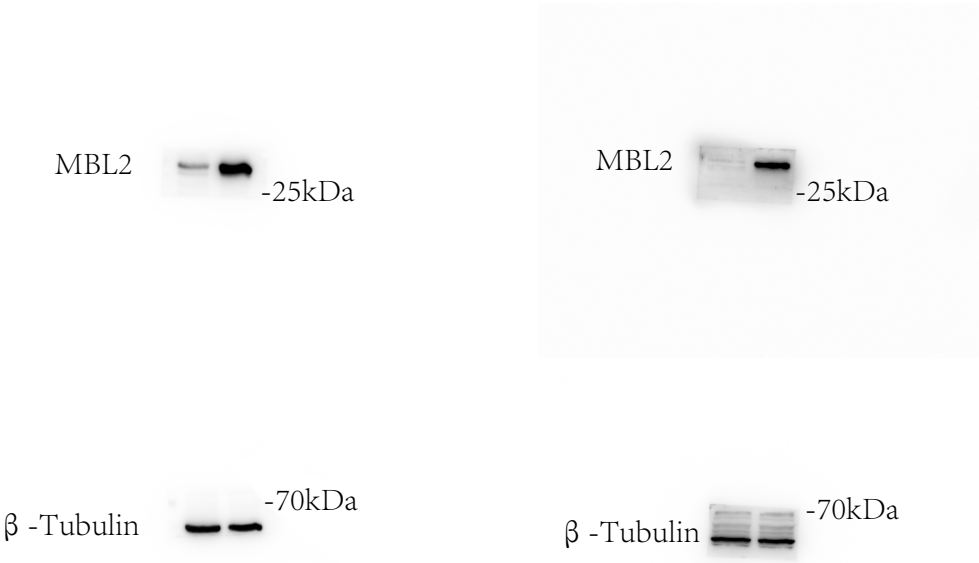

Figure 4-I

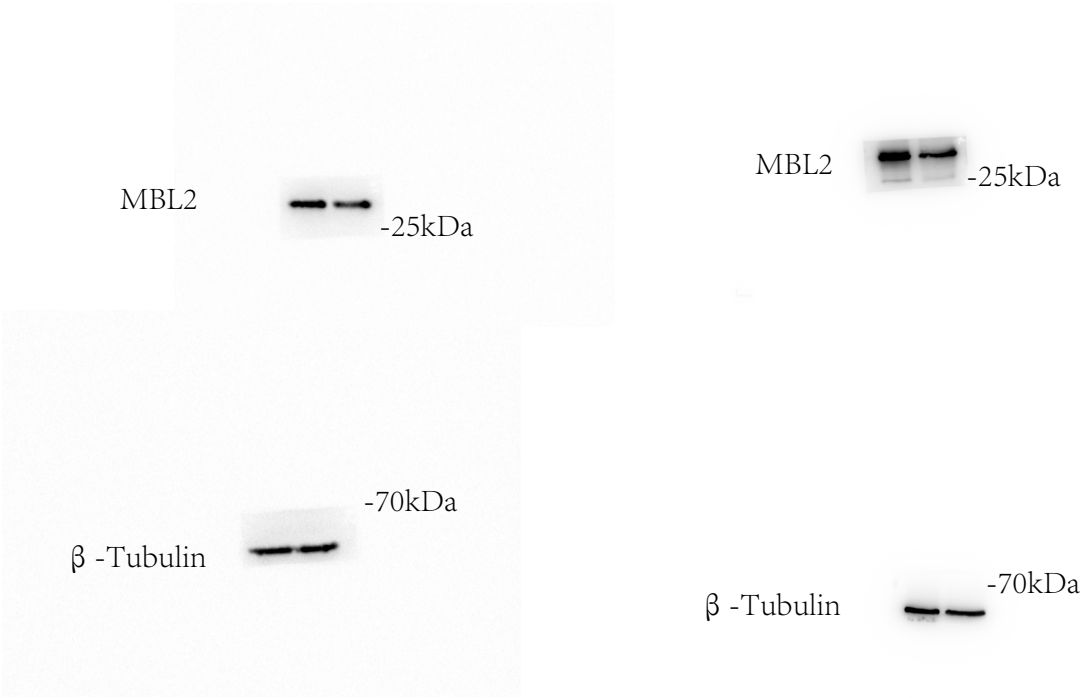

Supplement: s1 [file s1]
